# Supplementary material for: Down-regulating Circular RNA Prkcsh suppresses the inflammatory response after spinal cord injury
Source: PubMed Central journal article supplement — Neural Regen Res. 2021 Jun 7;17(1):144–51. doi: 10.4103/1673-5374.314114 (PMC8451560; doi:10.4103/1673-5374.314114), 2021-06-07
Supplement: NRR-17-144_Suppl2.pdf [file NRR-17-144_Suppl2.pdf]

## OPEN PEER REVIEW REPORT 2

**Name of journal:** Neural Regeneration Research

**Manuscript NO:** NRR-D-20-01000

**Title:** circPrkcsH/miR-488/Ccl2 Axis Regulates Inflammatory Responses After Spinal Cord Injury

**Reviewer's Name:** Eduardo Puelles

**Reviewer's country:** Spain

### COMMENTS TO AUTHORS

The authors have demonstrated by in vitro techniques the interaction between circPrkcsH, miR-488 and Ccl2 in the inflammatory responses after spinal cord injury. As the authors mention in the manuscript the only weakness is related with the fact that all the work is done in vitro and there is no in vivo analysis.

The results obtained are robust and I do not have concerns with the actual version of the manuscript.

As minor concerns that could be corrected:

At the beginning of results the authors mention that "the majority of identified circRNAs in the study were supported by more than 10 reads", could they be more accurate and indicate the exact percentage?

The photos of HE analysis are too small, I would recommend to increase their size.

Page 5 line 7, remove "to"

Page 24 line 6 replace "microgila" by "microglia"
