# Supplementary material for: Down-regulating Circular RNA Prkcsh suppresses the inflammatory response after spinal cord injury
Source: PubMed Central journal article supplement — Neural Regen Res. 2021 Jun 7;17(1):144–51. doi: 10.4103/1673-5374.314114 (PMC8451560; doi:10.4103/1673-5374.314114), 2021-06-07
Supplement: NRR-17-144_Suppl3.pdf [file NRR-17-144_Suppl3.pdf]

Fig.1B

| Accession    | con1_CO | con2_CO | con3_CO | sci1_SC | sci2_SC | sci3_SC |
|--------------|---------|---------|---------|---------|---------|---------|
|              | N_count | N_count | N_count | I_count | I_count | I_count |
| circRNA12433 | 57.50   | 0       | 13      | 73.50   | 75.50   | 114.50  |
| circRNA9375  | 283     | 19      | 160     | 511.50  | 446     | 746.40  |
| circRNA4569  | 62.42   | 43      | 54.92   | 158     | 169.08  | 268.00  |
| circRNA2114  | 22.23   | 13.50   | 16.33   | 39.72   | 60.67   | 98.95   |
| circRNA9664  | 631.47  | 85.33   | 260.08  | 682.50  | 993.48  | 2098.43 |
| circRNA13451 | 53      | 36      | 0       | 98      | 80      | 137     |
| ciRNA337     | 21      | 0       | 5       | 19      | 34      | 44      |
| circRNA7703  | 16      | 0       | 23      | 43      | 38      | 55      |
| circRNA7551  | 51      | 0       | 163     | 126     | 303     | 365.50  |
| circRNA986   | 29      | 71      | 76.25   | 125     | 208     | 306     |
| ciRNA54      | 12      | 0       | 10      | 21      | 19      | 39      |
| circRNA15268 | 391     | 136     | 247     | 894     | 666     | 1056    |
| circRNA10149 | 334     | 321     | 376.50  | 1091    | 897.83  | 1538.40 |
| circRNA16480 | 173     | 0       | 50      | 181     | 236     | 387     |
| circRNA16184 | 35      | 24.83   | 14      | 75      | 74      | 99.83   |
| circRNA8924  | 204.50  | 27      | 137.42  | 295.50  | 297.50  | 736.57  |
| circRNA9792  | 51      | 13      | 53      | 133     | 97      | 155     |
| circRNA8960  | 92.50   | 19.50   | 18.50   | 91.50   | 164.17  | 199     |
| circRNA3390  | 102.58  | 17      | 18.50   | 153.83  | 104.95  | 199.32  |
| circRNA13393 | 1661.83 | 569.50  | 453     | 2151.50 | 3255.04 | 3717.75 |
| circRNA14292 | 53      | 22      | 43.83   | 103.50  | 126     | 166.38  |
| circRNA11466 | 157.25  | 54      | 29      | 235.50  | 228.50  | 328     |
| circRNA3213  | 72      | 0       | 32      | 116     | 97      | 120     |
| circRNA10408 | 11.67   | 0       | 5.67    | 16      | 16.67   | 25      |
| circRNA3549  | 226     | 122     | 72      | 358     | 445     | 591     |
| circRNA9421  | 59      | 76      | 38      | 113     | 189.50  | 284.50  |
| circRNA6769  | 115     | 53      | 32      | 209.50  | 173.50  | 250.83  |
| circRNA7041  | 29      | 12.33   | 9       | 51.67   | 45      | 60.33   |
| circRNA5370  | 876     | 174     | 311     | 1456    | 1149.50 | 1629.98 |
| circRNA8436  | 76      | 0       | 86      | 129     | 156     | 241     |
| circRNA10481 | 42      | 1       | 19      | 59      | 48      | 91      |
| circRNA1329  | 169     | 40      | 104     | 270     | 251     | 490     |
| circRNA16013 | 70.50   | 0       | 32      | 68.50   | 108.50  | 162.50  |
| circRNA5321  | 62      | 0       | 33      | 75      | 94      | 138     |
| circRNA15386 | 102     | 70.50   | 106     | 220.50  | 212     | 475.50  |
| circRNA8378  | 348     | 185     | 136     | 479     | 549     | 1190    |
| circRNA7965  | 37      | 0       | 80      | 117     | 98      | 141     |
| circRNA10641 | 130     | 107     | 45      | 255.75  | 181     | 455     |
| circRNA15465 | 712     | 56      | 398.60  | 1003    | 973     | 1697.50 |
| circRNA3347  | 261.80  | 42      | 141     | 348     | 315.65  | 746.07  |
| circRNA7852  | 42      | 22      | 7.67    | 59.17   | 55.67   | 105.67  |
| circRNA4337  | 114     | 0       | 106     | 166     | 174     | 344     |
| circRNA14025 | 84.83   | 14.67   | 34.92   | 95.33   | 97.60   | 228.83  |
| circRNA8470  | 90      | 45      | 20      | 115     | 122     | 239     |
| circRNA6169  | 46.50   | 40      | 34.50   | 96      | 119.50  | 138.50  |
| circRNA10320 | 333.33  | 103.50  | 206     | 466     | 683.50  | 761.33  |
| circRNA1519  | 56.50   | 77.50   | 22.50   | 126     | 111.67  | 230.50  |
| circRNA12797 | 1042.50 | 426     | 564     | 1427    | 1699.17 | 3051.25 |
| circRNA12814 | 418     | 63      | 162     | 411     | 481     | 1118    |
| circRNA10845 | 164     | 27      | 118     | 226     | 262     | 436     |
| circRNA781   | 29      | 0       | 33      | 35      | 72      | 80      |
| circRNA15756 | 586.17  | 258.50  | 243.67  | 679.50  | 852.50  | 1817.70 |
| circRNA16012 | 48      | 0       | 25      | 66      | 52      | 93      |

|              |         |        |         |         |         |         |
|--------------|---------|--------|---------|---------|---------|---------|
| circRNA7435  | 211.67  | 21     | 125.33  | 291.17  | 290.67  | 459.08  |
| circRNA7312  | 70      | 35.17  | 48      | 110     | 127     | 214.17  |
| circRNA4575  | 118     | 27     | 59      | 154     | 126     | 326.58  |
| circRNA8746  | 124.83  | 59.17  | 64.92   | 174.33  | 167.93  | 399.83  |
| circRNA5692  | 17      | 70     | 55      | 87.50   | 109.50  | 223.50  |
| circRNA13755 | 49      | 82     | 8       | 93      | 93      | 224.83  |
| circRNA16116 | 135     | 51     | 33      | 161     | 159     | 317     |
| circRNA9875  | 32      | 17     | 43      | 63.83   | 83.33   | 115.33  |
| circRNA8872  | 19.67   | 0      | 22      | 31.67   | 29.67   | 57.50   |
| circRNA13667 | 27      | 18     | 17      | 52      | 48      | 71      |
| circRNA3350  | 220.63  | 40.67  | 96.00   | 209.83  | 279.90  | 561.85  |
| circRNA16614 | 96      | 31     | 29      | 98      | 108     | 251     |
| circRNA1518  | 61.50   | 77.50  | 46.83   | 126     | 134.67  | 267.50  |
| circRNA2544  | 192     | 58     | 168     | 289.71  | 296     | 605     |
| circRNA14373 | 23      | 0      | 32      | 28      | 55.17   | 70      |
| circRNA13861 | 80      | 53     | 8       | 101     | 107     | 170     |
| circRNA7918  | 122.25  | 33.50  | 60.92   | 117.58  | 160.08  | 333.73  |
| circRNA7436  | 147.67  | 21     | 124.33  | 170.17  | 242.67  | 392.08  |
| circRNA9281  | 49      | 11.50  | 40.50   | 56      | 83.75   | 139     |
| circRNA1633  | 799.33  | 346.42 | 509.23  | 1056.50 | 1083.18 | 2395.63 |
| circRNA5578  | 79      | 26     | 19      | 63      | 107     | 174     |
| ciRNA556     | 10.67   | 1.33   | 18      | 15      | 28.33   | 38      |
| circRNA5189  | 492     | 158    | 288     | 496     | 757.33  | 1290.50 |
| circRNA6874  | 61      | 22     | 14      | 78      | 62      | 108     |
| circRNA133   | 222.50  | 159.17 | 226.33  | 318.53  | 535.12  | 764.70  |
| circRNA14762 | 95.17   | 80.67  | 169.17  | 164.17  | 292.17  | 473.17  |
| circRNA3688  | 194     | 33     | 104     | 201     | 263.50  | 409     |
| circRNA1240  | 208.83  | 105.43 | 173.50  | 313     | 315     | 655     |
| circRNA2464  | 1701.33 | 888    | 1603.67 | 1883    | 3448    | 6017.17 |
| circRNA2098  | 354.50  | 178.17 | 286.33  | 501.53  | 623.12  | 973.37  |
| circRNA14344 | 114     | 20     | 66.50   | 123.17  | 129.83  | 264.23  |
| circRNA6867  | 260     | 107    | 160     | 290     | 332     | 743.33  |
| circRNA9349  | 105     | 121    | 154     | 159     | 338.25  | 477     |
| circRNA8640  | 36.50   | 18     | 22.63   | 61.08   | 48.83   | 72.35   |
| circRNA12580 | 51      | 25     | 18.50   | 72      | 71      | 76.50   |
| circRNA4166  | 46.50   | 14     | 21      | 58.33   | 54      | 77      |
| circRNA2289  | 56      | 18.50  | 27      | 67.50   | 70      | 100.50  |
| circRNA8781  | 67.74   | 17.93  | 39.86   | 55.43   | 102.34  | 152.07  |
| circRNA15076 | 281.50  | 74.50  | 257     | 282     | 457.50  | 768.50  |
| circRNA7723  | 9       | 12.50  | 6       | 20.50   | 17.50   | 23.17   |
| circRNA6463  | 57      | 13.50  | 54.50   | 74.50   | 105.50  | 106     |
| circRNA13604 | 522.75  | 275.50 | 326.50  | 542     | 707     | 1473.67 |
| circRNA4732  | 542     | 352    | 715     | 786     | 1162    | 1862.50 |
| circRNA10826 | 126.58  | 46.50  | 93.50   | 131     | 211.08  | 282.42  |
| circRNA2104  | 57.75   | 14     | 35.75   | 54.17   | 64.42   | 135.58  |
| circRNA16815 | 246     | 68     | 144.50  | 298.50  | 253     | 487     |
| circRNA3824  | 902     | 294.50 | 656.50  | 913     | 1180.75 | 2163.83 |
| circRNA8316  | 92.50   | 100.50 | 126     | 143.50  | 225     | 352.67  |
| circRNA5950  | 37      | 16     | 18      | 32      | 57      | 67.50   |
| circRNA4524  | 140     | 68     | 132     | 184     | 274.50  | 258     |
| circRNA9223  | 11.20   | 12.50  | 19.50   | 26.35   | 26.75   | 36.88   |
| circRNA9796  | 269     | 82     | 158     | 249     | 292     | 572.93  |
| circRNA13324 | 45      | 28     | 17      | 53      | 59      | 75      |
| circRNA14886 | 64.67   | 24.67  | 51.33   | 70.67   | 76.58   | 158.33  |
| circRNA15074 | 47      | 49.50  | 30.50   | 75.50   | 87      | 96.58   |
| circRNA2497  | 316     | 162    | 352     | 345     | 501     | 980.50  |

|              |         |         |        |        |        |         |
|--------------|---------|---------|--------|--------|--------|---------|
| circRNA3532  | 669     | 274     | 395    | 767    | 789.50 | 1240    |
| circRNA14002 | 163.33  | 74.00   | 97.67  | 137    | 216.33 | 375.33  |
| circRNA16605 | 315     | 112     | 200    | 240    | 443    | 678.33  |
| circRNA8183  | 60      | 27      | 28     | 46     | 77     | 125     |
| circRNA8719  | 73.58   | 47      | 48     | 79     | 140    | 124     |
| circRNA7211  | 56      | 51      | 62     | 93     | 89     | 165     |
| circRNA4049  | 49.77   | 23.40   | 26.50  | 49.80  | 60.61  | 95.33   |
| circRNA13959 | 222     | 79      | 218    | 224    | 294    | 584     |
| circRNA5480  | 57      | 48      | 47     | 81     | 93     | 131     |
| circRNA178   | 432     | 736     | 593.50 | 925    | 883.50 | 1772    |
| circRNA15565 | 195     | 73      | 259    | 287    | 270.50 | 503.50  |
| circRNA12344 | 765.50  | 361.50  | 528.50 | 732.50 | 942    | 1763.33 |
| circRNA9289  | 120.67  | 44.33   | 84.33  | 139    | 123.33 | 236.67  |
| circRNA2946  | 382.17  | 153.17  | 237.67 | 365.17 | 448.67 | 759.92  |
| circRNA1628  | 27      | 16.67   | 40.17  | 45.33  | 42.21  | 78.42   |
| circRNA11323 | 178.50  | 163     | 75     | 167    | 241    | 451     |
| circRNA7855  | 37.50   | 31      | 39.50  | 44     | 72.25  | 101.50  |
| circRNA13618 | 290     | 214     | 267    | 404    | 475.50 | 610     |
| circRNA9429  | 223     | 106     | 115    | 200    | 257    | 425     |
| circRNA4746  | 199.67  | 316.50  | 337.17 | 312.50 | 552.75 | 793.50  |
| circRNA9893  | 252.41  | 330.53  | 278.90 | 103.59 | 93.09  | 216.44  |
| circRNA10093 | 309.50  | 365     | 228.17 | 118.17 | 89.50  | 220     |
| circRNA11325 | 466.91  | 336.48  | 314.54 | 171.35 | 146.91 | 182.35  |
| circRNA4853  | 107.17  | 122     | 96.50  | 34.50  | 64     | 51.50   |
| circRNA7464  | 1010.76 | 921.34  | 709.66 | 288.06 | 361.65 | 607.49  |
| circRNA16798 | 46.73   | 35.17   | 45.18  | 16.50  | 13.40  | 29.75   |
| circRNA13446 | 32.05   | 51.45   | 48.40  | 16.30  | 21.35  | 22.20   |
| circRNA13534 | 38.37   | 29.00   | 30.92  | 13.10  | 9.85   | 23.08   |
| circRNA8155  | 740.15  | 816.91  | 626.37 | 261.78 | 271.14 | 492.73  |
| circRNA4592  | 505.50  | 497.83  | 408.50 | 214.97 | 176.50 | 235.17  |
| circRNA4277  | 176.44  | 211.58  | 206.12 | 60.29  | 81.44  | 141.44  |
| circRNA14387 | 56.60   | 63.17   | 84.37  | 18.33  | 28.20  | 52.43   |
| circRNA15528 | 50.83   | 61      | 82.17  | 20     | 21.50  | 52      |
| circRNA590   | 1079.09 | 1074.42 | 761.73 | 329.55 | 306.36 | 750.67  |
| circRNA6319  | 286.28  | 284.35  | 196.63 | 126.20 | 84.10  | 121.50  |
| circRNA11525 | 81.64   | 116.25  | 119.46 | 30.35  | 49.11  | 68.32   |
| circRNA2113  | 930.83  | 897     | 1065   | 216.50 | 450    | 729.67  |
| circRNA15558 | 202.90  | 308.13  | 238.26 | 87.47  | 91.84  | 164.79  |
| circRNA2607  | 90.66   | 89.45   | 63.97  | 36.02  | 29.63  | 39.81   |
| circRNA222   | 1020.61 | 1227.73 | 828.74 | 321.31 | 380.44 | 725.04  |
| circRNA10377 | 144     | 159     | 143.67 | 46.12  | 54.83  | 106.17  |
| circRNA16649 | 155.15  | 202.08  | 187.08 | 61.95  | 91.45  | 86.39   |
| circRNA9277  | 518.83  | 715.33  | 656.17 | 149.83 | 317.67 | 415.17  |
| circRNA8557  | 153.58  | 159.50  | 142.17 | 73.00  | 59.00  | 57.08   |
| circRNA5669  | 208.40  | 328.82  | 283.87 | 83.74  | 104.15 | 187.29  |
| circRNA13258 | 120.90  | 168.08  | 132.87 | 30.29  | 63.69  | 105.19  |
| circRNA10284 | 119.17  | 123.17  | 106.67 | 54.50  | 35.50  | 57.17   |
| circRNA14565 | 247.84  | 349.64  | 279.27 | 82.30  | 115.39 | 204.40  |
| circRNA16797 | 65.32   | 72.60   | 51.52  | 25.83  | 18.58  | 38.23   |
| circRNA13450 | 31.17   | 35      | 24.17  | 13     | 14.92  | 9       |
| circRNA389   | 152.13  | 114.29  | 125.97 | 43.24  | 55.64  | 74.27   |
| circRNA11116 | 1281.88 | 1225.43 | 844.75 | 385.25 | 328.99 | 793.60  |
| circRNA9569  | 135.01  | 147.30  | 110.27 | 46.15  | 43.13  | 84.56   |
| circRNA14825 | 162.53  | 156.70  | 114.81 | 46.15  | 47.18  | 102.96  |
| circRNA16349 | 171     | 134     | 164    | 43     | 36     | 143     |
| circRNA12235 | 616.89  | 738.49  | 783.61 | 282.46 | 256.91 | 371.21  |

|              |         |         |         |        |        |        |
|--------------|---------|---------|---------|--------|--------|--------|
| circRNA4835  | 295.33  | 367.33  | 240.00  | 74     | 144.33 | 188.67 |
| circRNA315   | 109.72  | 132.97  | 89.50   | 38     | 50.02  | 54.43  |
| circRNA7601  | 43.55   | 45.78   | 33.27   | 13.51  | 11.06  | 30.68  |
| circRNA13845 | 119.24  | 190.26  | 130.39  | 56.44  | 44.90  | 88.07  |
| circRNA10761 | 10.88   | 14.29   | 10.71   | 1.60   | 7.74   | 7.13   |
| circRNA13622 | 267.31  | 363.05  | 316.81  | 65.76  | 167.60 | 193.60 |
| circRNA6913  | 15.67   | 14      | 12.33   | 2.67   | 9.50   | 6.33   |
| circRNA2341  | 70      | 66      | 54.50   | 23.50  | 13     | 48     |
| circRNA16595 | 193.28  | 245.50  | 173.58  | 64.17  | 62.62  | 146.33 |
| circRNA387   | 27.25   | 33.25   | 37      | 10.25  | 14.25  | 17.50  |
| circRNA10165 | 120.04  | 95.43   | 103.45  | 37.66  | 44.26  | 53.24  |
| circRNA7071  | 935.95  | 659.18  | 622.28  | 290.83 | 255.80 | 388.22 |
| circRNA16650 | 245.82  | 313.07  | 288.91  | 100.99 | 119.42 | 135.72 |
| circRNA8251  | 246.43  | 313.07  | 288.91  | 100.99 | 119.42 | 135.80 |
| circRNA9205  | 104.48  | 148.50  | 126.25  | 22.45  | 67.88  | 81.02  |
| circRNA1084  | 165.94  | 160.56  | 141.75  | 40.90  | 73.94  | 89.70  |
| circRNA16307 | 160.12  | 136.57  | 172.91  | 46.63  | 34.97  | 131.40 |
| circRNA6371  | 306.28  | 377.25  | 352.21  | 73.16  | 178.56 | 207.20 |
| circRNA15056 | 25      | 38.10   | 36.28   | 8.85   | 13.55  | 21.20  |
| circRNA3618  | 151.85  | 211.13  | 131.56  | 52.76  | 57.46  | 103.47 |
| circRNA4384  | 25.55   | 43.67   | 43.33   | 15.87  | 16.47  | 12     |
| circRNA15237 | 617.36  | 474.16  | 431.23  | 177.33 | 170.93 | 300.71 |
| circRNA16513 | 27.65   | 31.50   | 34.85   | 8.35   | 14.30  | 18.07  |
| circRNA12949 | 174.96  | 209.02  | 160.78  | 41.90  | 74.87  | 126.23 |
| circRNA4503  | 51.31   | 55.43   | 35.45   | 19.70  | 18.21  | 19.09  |
| circRNA6101  | 104.25  | 173.50  | 138.25  | 53.50  | 59.60  | 54     |
| circRNA5581  | 527.25  | 701.38  | 546.16  | 210.58 | 217.10 | 310.57 |
| circRNA7022  | 198.60  | 244.36  | 192.17  | 69.14  | 87.30  | 108.99 |
| circRNA9402  | 12.08   | 17.92   | 11.75   | 4.50   | 4      | 9.50   |
| circRNA558   | 121.58  | 198.58  | 162.17  | 49.67  | 79.65  | 68.58  |
| circRNA591   | 1120.96 | 1172.65 | 794.61  | 340.24 | 298.10 | 683.27 |
| circRNA61    | 433.75  | 405     | 339.50  | 162    | 85     | 241    |
| circRNA14276 | 175.81  | 126.33  | 117.10  | 34     | 59.50  | 89.25  |
| circRNA13910 | 166.17  | 248.41  | 205.34  | 67.65  | 89.32  | 96.64  |
| circRNA14669 | 351.50  | 574.48  | 507.05  | 159.78 | 164.96 | 271.06 |
| circRNA5731  | 138.21  | 147.64  | 111.26  | 53.86  | 45.27  | 59.00  |
| circRNA1760  | 88.93   | 134.25  | 118.95  | 23     | 41.70  | 88.27  |
| circRNA6370  | 539.98  | 423.91  | 447.51  | 100.50 | 227.15 | 283.88 |
| circRNA6775  | 34.67   | 58.97   | 51.50   | 10.37  | 29.50  | 20.47  |
| circRNA515   | 500.50  | 559.50  | 461.50  | 230    | 116    | 251.50 |
| circRNA4211  | 80.21   | 118.69  | 70.94   | 36.79  | 24.53  | 45.94  |
| circRNA225   | 196.89  | 193.00  | 138.27  | 32.67  | 73.87  | 126.33 |
| circRNA4790  | 58.78   | 45.03   | 71.52   | 16.56  | 24.86  | 31.15  |
| circRNA4820  | 668.97  | 985.80  | 609.22  | 275.61 | 315.05 | 296.49 |
| circRNA12739 | 763.90  | 725.50  | 597.50  | 221.50 | 263.50 | 368    |
| circRNA2636  | 110.25  | 144.83  | 100.42  | 35.25  | 48.83  | 61.45  |
| circRNA15238 | 434.71  | 433.81  | 381.33  | 139.98 | 142.13 | 227.06 |
| circRNA6448  | 147     | 136     | 158     | 44     | 63     | 72.50  |
| circRNA4786  | 102.10  | 81.84   | 122.51  | 33.33  | 39.17  | 51.60  |
| circRNA4213  | 59.84   | 72.03   | 54.47   | 22.53  | 16.90  | 36.10  |
| circRNA3440  | 1059.67 | 754     | 782     | 223.50 | 335.50 | 530    |
| circRNA847   | 103.68  | 94.02   | 76.02   | 31.17  | 33.73  | 43.78  |
| circRNA6102  | 170.08  | 237.50  | 157.25  | 70     | 67.77  | 81.83  |
| circRNA10228 | 1299.92 | 1167.25 | 1038.17 | 389    | 417.50 | 590.80 |
| circRNA2309  | 152.28  | 234.60  | 173.45  | 46.37  | 69.36  | 117.66 |
| circRNA2872  | 64      | 59      | 54      | 9      | 29.75  | 37.14  |

|              |         |         |         |        |        |         |
|--------------|---------|---------|---------|--------|--------|---------|
| circRNA6308  | 54.36   | 68.75   | 45.79   | 11.54  | 21.78  | 38.70   |
| circRNA7809  | 408.95  | 404.86  | 285.48  | 143.52 | 123.92 | 154.15  |
| circRNA16179 | 152.60  | 244.36  | 189.67  | 52.81  | 82.59  | 100.66  |
| circRNA8553  | 95.55   | 116.95  | 71.20   | 26.85  | 40.45  | 45.65   |
| circRNA452   | 437.25  | 701.38  | 496.66  | 181.58 | 202.85 | 253.57  |
| circRNA7807  | 335.16  | 365.81  | 235.94  | 122.65 | 105.92 | 126.07  |
| circRNA16389 | 626.89  | 868.11  | 568.19  | 194.15 | 197.29 | 456.74  |
| circRNA636   | 109.67  | 128.67  | 104     | 55.33  | 21.67  | 49.17   |
| circRNA7289  | 69      | 120     | 82      | 12.50  | 38.50  | 66      |
| circRNA7795  | 98.80   | 101.33  | 86.60   | 37.80  | 28.60  | 42.33   |
| circRNA15117 | 119.50  | 115.40  | 84.56   | 28.67  | 29.88  | 72.67   |
| circRNA10583 | 222.20  | 362     | 275.15  | 113.25 | 77.13  | 133.60  |
| circRNA13731 | 21.49   | 30.07   | 24.55   | 8.85   | 9.34   | 10.46   |
| circRNA14884 | 138     | 134     | 102.33  | 57     | 31.50  | 47      |
| circRNA7808  | 372.01  | 400.94  | 276.96  | 130.42 | 118.86 | 142.64  |
| circRNA13306 | 29.95   | 48.00   | 33.09   | 13.27  | 11.83  | 16.71   |
| circRNA11467 | 41.50   | 69.67   | 61.83   | 17.33  | 20     | 29.67   |
| circRNA9294  | 119.46  | 209.02  | 150.78  | 35.40  | 58.03  | 100.57  |
| circRNA12516 | 1620.70 | 2348.66 | 1703.49 | 496.04 | 687.78 | 1046.90 |
| circRNA13226 | 326     | 441.50  | 313.50  | 145    | 91.50  | 161     |
| circRNA5536  | 484.49  | 715.24  | 717.11  | 217.51 | 210.66 | 288.31  |
| circRNA14955 | 33      | 46      | 37.42   | 3.33   | 19.58  | 26      |
| circRNA3589  | 153.45  | 208.37  | 137.38  | 51.23  | 60.58  | 76.00   |
| circRNA263   | 497.33  | 690.50  | 647     | 155.50 | 252.50 | 297     |
| circRNA4964  | 157.39  | 183.54  | 115.88  | 40.25  | 46.80  | 92.13   |
| circRNA8250  | 99.33   | 156.89  | 158.70  | 36.22  | 65.82  | 53.06   |
| circRNA10047 | 36.15   | 48.00   | 36.69   | 14.27  | 11.83  | 18.51   |
| circRNA15535 | 150.15  | 128     | 92.64   | 41     | 30.05  | 70.25   |
| circRNA3099  | 95.88   | 150.08  | 101.71  | 25.00  | 36.50  | 77.92   |
| circRNA1086  | 85.30   | 143.56  | 122.25  | 27.65  | 51.94  | 53.95   |
| circRNA185   | 155.83  | 114.40  | 115.42  | 48.50  | 37.55  | 53.62   |
| circRNA7453  | 114     | 142     | 169     | 58     | 62     | 23      |
| circRNA14219 | 75.50   | 65      | 75      | 20.50  | 25.50  | 35.50   |
| circRNA16388 | 59.68   | 99.64   | 73.17   | 20.37  | 25.25  | 43.37   |
| circRNA13783 | 181.83  | 276.00  | 166.67  | 75.33  | 60.67  | 88.17   |
| circRNA12962 | 31.90   | 35      | 38      | 6.50   | 10     | 26      |
| circRNA13007 | 318.50  | 503.83  | 458.92  | 118    | 148.28 | 211.12  |
| circRNA11033 | 105.23  | 74.63   | 115.17  | 15.92  | 31.62  | 72.38   |
| circRNA564   | 191.50  | 182.50  | 271.50  | 64.50  | 76     | 95      |
| circRNA4788  | 60.10   | 74.94   | 100.01  | 22.33  | 29.63  | 33.35   |
| circRNA6898  | 67      | 76.50   | 56      | 30.75  | 19     | 15.50   |
| circRNA15699 | 531.25  | 590.50  | 336     | 127    | 117.33 | 314.64  |
| circRNA12010 | 450     | 271.25  | 373.50  | 137    | 125.25 | 114.91  |
| circRNA794   | 370.50  | 647     | 586     | 69     | 266    | 287.50  |
| circRNA15118 | 76.00   | 77.07   | 82.22   | 23.33  | 24.22  | 38.33   |
| circRNA3728  | 159.80  | 120.40  | 157.08  | 31.80  | 56.77  | 74.92   |
| circRNA12126 | 34.86   | 43.29   | 55.39   | 7.24   | 19.08  | 24.73   |
| circRNA7810  | 308.83  | 367.03  | 259.32  | 113.19 | 100.25 | 105.90  |
| circRNA16231 | 72.03   | 99.33   | 113.67  | 22.67  | 40.40  | 39.33   |
| circRNA13009 | 20      | 24.33   | 16      | 6.33   | 3.67   | 12      |
| circRNA15108 | 25.40   | 19      | 16.40   | 3.63   | 8.40   | 10.67   |
| circRNA16482 | 271.89  | 355.61  | 231.05  | 100.08 | 94.32  | 94.32   |
| circRNA10523 | 331.62  | 485.17  | 456.06  | 92.00  | 121.28 | 263.32  |
| circRNA12582 | 329.20  | 382.89  | 267.57  | 97.16  | 108.86 | 136.46  |
| circRNA6827  | 123.33  | 90.33   | 76.30   | 39.75  | 22     | 34.50   |
| circRNA15000 | 115.20  | 164.16  | 101.69  | 34.82  | 49.63  | 47.95   |

|              |         |         |        |         |        |        |
|--------------|---------|---------|--------|---------|--------|--------|
| circRNA13219 | 115.83  | 113.83  | 105.58 | 33.33   | 41.83  | 39.29  |
| circRNA1697  | 124.18  | 156.25  | 183.28 | 37.50   | 68.14  | 55.38  |
| circRNA14521 | 30.65   | 37.25   | 35.38  | 3.25    | 13.88  | 23.00  |
| circRNA4024  | 220.70  | 386.92  | 328.90 | 53.03   | 126.41 | 163.93 |
| circRNA12295 | 218.62  | 412.92  | 342.56 | 64.83   | 83.78  | 215.28 |
| circRNA16800 | 132.18  | 91.25   | 148.33 | 32.55   | 39.42  | 59.33  |
| circRNA12435 | 115.83  | 89.17   | 88.58  | 24.67   | 33.17  | 46.08  |
| circRNA592   | 773.62  | 1070.13 | 714.99 | 245.27  | 228.45 | 420.06 |
| circRNA12133 | 47      | 61      | 58     | 23      | 10     | 21     |
| circRNA13133 | 126.36  | 196.96  | 131.95 | 38.80   | 58.44  | 59.05  |
| circRNA5614  | 141.86  | 141.06  | 85.47  | 22.75   | 36.93  | 76.62  |
| circRNA11179 | 299.30  | 382.89  | 259.44 | 90.03   | 104.11 | 125.66 |
| circRNA16366 | 100.24  | 79.93   | 57.17  | 16.96   | 22.18  | 47.44  |
| circRNA5171  | 221     | 342     | 354    | 26      | 167    | 144    |
| circRNA2239  | 24.08   | 35.83   | 31.99  | 4.13    | 14.36  | 14.86  |
| circRNA824   | 503.80  | 467     | 451    | 84.40   | 99     | 355.87 |
| circRNA12583 | 256.57  | 329.17  | 213.88 | 68.31   | 87.97  | 118.95 |
| circRNA6307  | 26.72   | 47.25   | 35.27  | 6.64    | 13.84  | 18.46  |
| circRNA4505  | 237.96  | 249.16  | 204.89 | 68.87   | 62.04  | 101.42 |
| circRNA60    | 32      | 29.50   | 44     | 14      | 10     | 8.50   |
| circRNA15119 | 37.55   | 53.07   | 61.27  | 11.83   | 17.71  | 22.33  |
| circRNA5617  | 66.16   | 77.44   | 41.14  | 13.75   | 9.46   | 44.31  |
| circRNA7013  | 71.94   | 93.43   | 70.46  | 24.38   | 18.46  | 35.88  |
| circRNA14029 | 81.33   | 81.33   | 69.00  | 15.33   | 17.73  | 51.00  |
| circRNA2985  | 88.43   | 59.88   | 108.45 | 25.95   | 30.12  | 26.73  |
| circRNA583   | 542     | 866     | 631.20 | 199     | 224    | 241    |
| circRNA15214 | 20      | 26.50   | 21.50  | 3       | 12     | 8.50   |
| circRNA16176 | 88.03   | 122.37  | 85.55  | 27.35   | 25.87  | 46.16  |
| circRNA3632  | 598.86  | 676.44  | 474.51 | 186.09  | 145.70 | 239.53 |
| circRNA1491  | 88.33   | 62      | 94.50  | 21.50   | 29.83  | 28.50  |
| circRNA963   | 119.50  | 109.50  | 111.50 | 29      | 17     | 73     |
| circRNA10139 | 409.83  | 395.00  | 271.50 | 154.50  | 53.67  | 118.17 |
| circRNA14389 | 43.79   | 59      | 78.50  | 15      | 29.50  | 11.86  |
| circRNA4130  | 141.23  | 162.03  | 134.78 | 43.13   | 45.83  | 50.09  |
| circRNA8124  | 309.50  | 221     | 233    | 56      | 63     | 144    |
| circRNA11739 | 123.42  | 165.85  | 109.53 | 36.83   | 49.42  | 39.07  |
| circRNA12634 | 25.41   | 42.75   | 30.34  | 3.71    | 9.32   | 22.88  |
| ciRNA380     | 117     | 151     | 115    | 23      | 25     | 88     |
| circRNA16724 | 122.83  | 89      | 101.50 | 34      | 25.25  | 39     |
| circRNA11035 | 121.70  | 130.23  | 161.00 | 22.72   | 26.30  | 98.48  |
| circRNA3945  | 193.88  | 150.58  | 109.62 | 50.92   | 36.49  | 52.25  |
| circRNA402   | 341.83  | 379.67  | 302.33 | 111.17  | 82.50  | 120.67 |
| circRNA3441  | 136.17  | 171     | 180    | 43      | 45     | 66.50  |
| circRNA3939  | 68.11   | 105.53  | 67.51  | 23.13   | 20.81  | 30.96  |
| circRNA11845 | 9.47    | 6.88    | 5.88   | 0.50    | 3.75   | 3.38   |
| circRNA5026  | 421.25  | 745.25  | 682.17 | 94      | 235.50 | 273.80 |
| circRNA3929  | 244.58  | 310.97  | 201.58 | 46.75   | 68.30  | 135.08 |
| circRNA11738 | 85      | 47      | 62     | 6       | 34     | 23     |
| circRNA709   | 4661.50 | 3609.50 | 5340   | 1157.83 | 1168   | 1883   |
| circRNA1096  | 189.67  | 279.67  | 301.00 | 59.00   | 84.33  | 92.67  |
| circRNA9850  | 212.42  | 282.47  | 175.92 | 39.58   | 58.63  | 120.08 |
| circRNA8697  | 50.33   | 67.75   | 40.83  | 11.25   | 24.50  | 11     |
| circRNA11346 | 39.08   | 31.17   | 20.75  | 12.50   | 4.25   | 8.42   |
| circRNA2986  | 64.10   | 59.55   | 74.45  | 13.95   | 27.45  | 17.40  |
| circRNA4506  | 212.96  | 249.16  | 187.39 | 58.37   | 54.54  | 80.92  |
| circRNA2627  | 57.08   | 96.40   | 93.07  | 14.70   | 27.40  | 34.57  |

|              |        |        |        |        |        |        |
|--------------|--------|--------|--------|--------|--------|--------|
| circRNA14575 | 110    | 132    | 102    | 36     | 30     | 31     |
| circRNA7939  | 152.13 | 267.50 | 211.83 | 49.33  | 63.17  | 73.67  |
| circRNA277   | 412.36 | 632.29 | 452.76 | 128.89 | 125.70 | 181.46 |
| circRNA4507  | 155.96 | 249.16 | 179.06 | 52.04  | 48.54  | 68.26  |
| circRNA15104 | 117.08 | 207.30 | 153.75 | 24.08  | 49.37  | 73.25  |
| circRNA10843 | 50.50  | 82.50  | 67.50  | 15.50  | 15     | 28.50  |
| circRNA6840  | 24.33  | 41.33  | 46.33  | 2.67   | 18.14  | 13.67  |
| circRNA4247  | 56     | 67     | 69     | 7      | 22     | 31     |
| circRNA9231  | 21.67  | 40     | 32     | 0      | 15.75  | 14.50  |
| circRNA472   | 472.96 | 885.83 | 755.16 | 138.00 | 187.95 | 302.32 |
| circRNA1807  | 39     | 72.50  | 48     | 5.50   | 23     | 19.50  |
| circRNA5244  | 42.49  | 41.63  | 34.49  | 7.17   | 10.57  | 17.73  |
| circRNA3631  | 363.93 | 607.13 | 435.99 | 109.89 | 121.20 | 168.44 |
| circRNA4283  | 217.51 | 416.66 | 362.73 | 44.33  | 121.29 | 130.36 |
| circRNA5236  | 402.50 | 354    | 258    | 94     | 78.50  | 103    |
| circRNA4508  | 125.51 | 229.91 | 174.31 | 43.00  | 44.49  | 56.51  |
| circRNA2737  | 19.20  | 20     | 17     | 5.67   | 3.67   | 5.33   |
| circRNA4     | 60.33  | 43.33  | 42.67  | 20     | 7      | 7.67   |
| circRNA7339  | 47     | 90     | 69.50  | 13     | 23     | 18     |
| circRNA4780  | 152.83 | 171    | 233.50 | 59.50  | 31.67  | 45.17  |
| circRNA16191 | 36.50  | 22.33  | 28.90  | 4.85   | 9.43   | 9.29   |
| circRNA7067  | 118    | 120.33 | 145.15 | 20.35  | 50.93  | 27.79  |
| circRNA4307  | 34.17  | 57     | 47.33  | 11     | 8      | 17     |
| circRNA13094 | 86.88  | 159.62 | 100.60 | 37.45  | 21.88  | 22.20  |
| circRNA7066  | 97.50  | 120.33 | 142.65 | 17.10  | 48.93  | 25.04  |
| circRNA12030 | 62     | 80.50  | 59.50  | 2      | 21     | 34.50  |
| circRNA8315  | 109    | 202.75 | 139.83 | 22.83  | 50.83  | 38.17  |
| circRNA3796  | 29.40  | 31.00  | 24.20  | 1.20   | 6.80   | 16.20  |
| circRNA7730  | 107    | 169    | 129    | 10     | 25     | 77     |
| circRNA6012  | 24.13  | 46.40  | 33.60  | 4.50   | 10.93  | 10.40  |
| circRNA10375 | 43.32  | 71.30  | 79.80  | 8.60   | 12.20  | 28.70  |
| circRNA13179 | 47.07  | 58.83  | 74.87  | 13.42  | 12.47  | 15.43  |
| circRNA6311  | 25.96  | 48.90  | 30.02  | 1.75   | 8.06   | 18.08  |

Fig.1C

|               | Seq      |          | PCR      |          |
|---------------|----------|----------|----------|----------|
| circRNAPrkcsh | 2.280925 | 1.547565 | 1.394744 | 1.205808 |
| circRNA2947   | 4.587584 | 3.655326 | 3.482202 | 3.386981 |
| circRNA472    | 0.310377 | 0.641713 | 0.570382 | 0.907519 |
| circRNA709    | 0.330672 | 0.320856 | 0.329877 | 0.287175 |

Fig.1D

| miR_name                | SCI1  | SCI2  | SCI3  | CON1  | CON2 | CON3 |
|-------------------------|-------|-------|-------|-------|------|------|
| mmu-miR-155-5p          | 1,212 | 1,495 | 1,347 | 334   | 375  | 331  |
| mmu-mir-6240-p3_1ss23GT | 3,665 | 1,349 | 1,359 | 1,268 | 211  | 157  |
| mmu-miR-6540-3p         | 0     | 5     | 13    | 5     | 0    | 0    |
| mmu-miR-344h-3p         | 11    | 0     | 10    | 5     | 0    | 0    |
| mmu-miR-351-3p          | 110   | 85    | 69    | 32    | 26   | 14   |
| mmu-miR-15a-3p          | 17    | 15    | 13    | 12    | 0    | 0    |
| mmu-miR-339-5p_R-2      | 3,667 | 1,963 | 4,203 | 1,762 | 451  | 633  |
| mmu-miR-1964-3p         | 39    | 49    | 38    | 16    | 13   | 9    |
| mmu-miR-574-5p          | 772   | 572   | 960   | 367   | 178  | 174  |
| mmu-miR-130b-3p         | 277   | 362   | 357   | 113   | 128  | 76   |
| mmu-miR-142a-3p_R-1     | 2,112 | 1,869 | 2,976 | 1,164 | 688  | 475  |
| mmu-miR-5113_L+1        | 23    | 61    | 50    | 10    | 12   | 23   |
| mmu-miR-5121_L-1        | 71    | 45    | 78    | 17    | 31   | 18   |

|                          |        |        |        |        |        |        |
|--------------------------|--------|--------|--------|--------|--------|--------|
| mmu-miR-7689-3p          | 68     | 41     | 50     | 28     | 19     | 7      |
| mmu-miR-486a-5p          | 41,907 | 98,649 | 56,858 | 22,292 | 20,856 | 25,111 |
| mmu-miR-574-3p           | 2,723  | 1,885  | 4,895  | 1,700  | 785    | 803    |
| mmu-miR-17-5p            | 6,967  | 8,297  | 12,232 | 3,262  | 3,799  | 2,649  |
| mmu-miR-214-5p           | 71     | 66     | 42     | 25     | 17     | 21     |
| mmu-miR-25-5p_R+1        | 124    | 194    | 134    | 53     | 54     | 54     |
| mmu-miR-17-3p            | 254    | 484    | 433    | 112    | 176    | 135    |
| mmu-let-7d-3p            | 21,735 | 15,350 | 25,992 | 13,086 | 3,407  | 6,324  |
| mmu-miR-142a-5p_L+2R-2   | 25,399 | 42,747 | 31,413 | 9,225  | 14,324 | 12,986 |
| mmu-miR-16-1-3p_R+1      | 29     | 34     | 30     | 27     | 0      | 7      |
| mmu-miR-466n-5p          | 0      | 3      | 4      | 0      | 0      | 3      |
| mmu-miR-1306-3p_R+1      | 13     | 51     | 36     | 7      | 15     | 15     |
| mmu-miR-20a-5p           | 5,684  | 7,395  | 11,047 | 2,980  | 3,512  | 2,532  |
| mmu-miR-193a-3p_R-2      | 48     | 10     | 24     | 18     | 8      | 5      |
| mmu-mir-3964-p3_1ss6GA   | 21     | 67     | 103    | 9      | 39     | 24     |
| mmu-miR-92a-3p_R+1       | 14,424 | 21,016 | 19,857 | 6,368  | 7,618  | 7,480  |
| mmu-mir-6481-p3_1ss19GA  | 181    | 140    | 242    | 53     | 41     | 125    |
| mmu-miR-365-2-5p_L+1R-1  | 16     | 24     | 17     | 7      | 6      | 9      |
| mmu-mir-6236-p5          | 2,386  | 521    | 846    | 977    | 295    | 216    |
| mmu-miR-344e-3p          | 60     | 54     | 61     | 24     | 18     | 27     |
| mmu-miR-486b-3p_R+2      | 329    | 804    | 579    | 159    | 284    | 238    |
| mmu-miR-3066-5p_R+1      | 7      | 12     | 8      | 5      | 5      | 0      |
| mmu-let-7b-3p_1ss22CT    | 4,421  | 1,462  | 3,341  | 3,011  | 312    | 432    |
| mmu-miR-3473a_1ss18AC    | 2      | 3      | 5      | 2      | 0      | 2      |
| mmu-miR-423-3p           | 8,495  | 5,673  | 7,191  | 4,420  | 1,808  | 2,503  |
| mmu-miR-7032-3p          | 21     | 5      | 16     | 12     | 0      | 5      |
| mmu-miR-466i-3p_R-1      | 24     | 3      | 9      | 15     | 0      | 0      |
| mmu-miR-344f-3p_R+1      | 14     | 28     | 30     | 12     | 11     | 7      |
| mmu-miR-1306-5p_L-2      | 308    | 86     | 274    | 188    | 53     | 36     |
| mmu-miR-3968_L-3_1ss14AT | 888    | 483    | 989    | 290    | 403    | 305    |
| mmu-miR-296-3p_L-1       | 189    | 339    | 307    | 93     | 126    | 134    |
| mmu-miR-210-3p           | 662    | 789    | 1,475  | 394    | 444    | 403    |
| mmu-miR-19a-3p           | 338    | 215    | 622    | 240    | 151    | 111    |
| mmu-miR-185-3p           | 95     | 153    | 273    | 105    | 45     | 73     |
| mmu-miR-324-3p_L-2R+3    | 611    | 308    | 569    | 408    | 109    | 121    |
| mmu-miR-494-3p_R+1       | 115    | 36     | 41     | 45     | 24     | 13     |
| mmu-miR-146b-3p          | 31     | 30     | 11     | 7      | 10     | 15     |
| mmu-miR-8114_R+2         | 1,271  | 141    | 438    | 749    | 28     | 30     |
| mmu-miR-452-5p_L+3R-1    | 8      | 14     | 0      | 4      | 5      | 0      |
| mmu-miR-669e-3p_R+1      | 8      | 0      | 6      | 6      | 0      | 0      |
| mmu-miR-1949             | 20     | 0      | 6      | 0      | 6      | 5      |
| mmu-miR-23b-5p           | 124    | 263    | 168    | 57     | 88     | 101    |
| mmu-miR-196a-1-3p_L+1R-1 | 41     | 111    | 30     | 12     | 36     | 35     |
| mmu-miR-203-3p           | 2,308  | 3,363  | 4,607  | 1,331  | 1,731  | 1,631  |
| mmu-miR-484              | 15,269 | 5,471  | 11,212 | 9,711  | 2,573  | 2,384  |
| mmu-miR-106b-3p_R-2      | 1,011  | 954    | 847    | 519    | 413    | 363    |
| mmu-miR-8112_R+2         | 118    | 0      | 55     | 80     | 0      | 0      |
| mmu-miR-467e-3p          | 20     | 0      | 0      | 9      | 0      | 0      |
| mmu-miR-7653-3p          | 10     | 0      | 0      | 5      | 0      | 0      |
| mmu-miR-542-5p           | 9      | 5      | 7      | 10     | 0      | 0      |
| mmu-miR-144-5p           | 5,971  | 12,517 | 10,028 | 3,627  | 5,217  | 4,827  |
| mmu-miR-8103_R+1         | 73     | 51     | 57     | 38     | 16     | 33     |
| mmu-miR-532-3p           | 1,166  | 304    | 937    | 891    | 125    | 147    |
| mmu-miR-221-3p_R-1       | 5,096  | 8,676  | 6,511  | 2,676  | 3,452  | 3,690  |
| mmu-miR-15b-5p           | 8,072  | 18,935 | 16,179 | 4,324  | 9,034  | 7,613  |
| mmu-miR-215-5p           | 9      | 31     | 35     | 9      | 8      | 20     |



|                             |        |        |        |        |        |        |
|-----------------------------|--------|--------|--------|--------|--------|--------|
| mmu-miR-466h-3p_R+3         | 64     | 22     | 48     | 55     | 4      | 7      |
| mmu-miR-501-5p_R-1          | 198    | 163    | 288    | 151    | 86     | 80     |
| mmu-miR-1912-3p             | 9      | 7      | 0      | 0      | 0      | 8      |
| mmu-miR-511-3p              | 219    | 172    | 216    | 125    | 111    | 64     |
| mmu-miR-149-3p              | 0      | 30     | 33     | 5      | 17     | 9      |
| mmu-miR-200c-3p             | 176    | 320    | 309    | 176    | 120    | 105    |
| mmu-miR-99b-3p_R+1          | 370    | 596    | 752    | 265    | 275    | 325    |
| mmu-miR-677-5p_R+2          | 7      | 0      | 0      | 3      | 0      | 0      |
| mmu-miR-6946-5p             | 7      | 0      | 0      | 3      | 0      | 0      |
| mmu-miR-28a-3p              | 432    | 508    | 414    | 244    | 228    | 213    |
| mmu-miR-673-5p_R-1          | 321    | 213    | 362    | 195    | 104    | 155    |
| mmu-miR-339-3p_R-2          | 341    | 460    | 415    | 178    | 205    | 233    |
| mmu-miR-671-3p              | 542    | 317    | 367    | 292    | 150    | 182    |
| mmu-mir-1983-p5_1ss1GA      | 18     | 15     | 16     | 17     | 8      | 0      |
| mmu-miR-466p-5p             | 4      | 0      | 1      | 3      | 0      | 0      |
| mmu-miR-193a-5p             | 51     | 76     | 126    | 39     | 38     | 55     |
| mmu-miR-16-2-3p             | 141    | 110    | 70     | 96     | 36     | 37     |
| mmu-miR-188-5p_R+1          | 37     | 24     | 29     | 16     | 23     | 8      |
| mmu-miR-3074-5p             | 8      | 20     | 9      | 6      | 7      | 7      |
| mmu-miR-378b_R-1            | 4      | 4      | 10     | 4      | 4      | 2      |
| mmu-miR-1930-5p             | 29     | 21     | 23     | 16     | 15     | 7      |
| mmu-miR-331-3p              | 5,071  | 2,715  | 4,169  | 3,442  | 1,181  | 1,699  |
| mmu-miR-145b_R-2_1ss18GA    | 4      | 5      | 5      | 2      | 5      | 0      |
| mmu-miR-15b-3p              | 393    | 438    | 400    | 225    | 250    | 181    |
| mmu-miR-222-3p_R+2          | 4,199  | 3,381  | 3,233  | 2,298  | 1,719  | 1,753  |
| mmu-miR-877-5p_R+4          | 371    | 430    | 456    | 219    | 238    | 215    |
| mmu-miR-511-5p_L+1          | 0      | 6      | 0      | 3      | 0      | 0      |
| mmu-let-7i-3p               | 371    | 216    | 480    | 293    | 143    | 139    |
| mmu-miR-144-3p_R-1          | 14,424 | 17,633 | 17,247 | 7,645  | 11,673 | 7,592  |
| mmu-miR-6516-3p_L-3R+2      | 52     | 38     | 29     | 32     | 14     | 19     |
| mmu-miR-6412_R-2_1ss15AT    | 24     | 9      | 13     | 19     | 0      | 7      |
| mmu-miR-25-3p               | 7,445  | 21,836 | 18,998 | 4,847  | 11,821 | 10,019 |
| mmu-miR-106b-5p             | 7,574  | 6,795  | 9,588  | 5,188  | 4,689  | 3,403  |
| mmu-miR-34c-3p              | 590    | 913    | 802    | 363    | 504    | 415    |
| mmu-miR-328-3p              | 25,005 | 9,773  | 23,737 | 20,306 | 4,834  | 7,518  |
| mmu-miR-6691-5p             | 20     | 22     | 29     | 14     | 14     | 12     |
| mmu-miR-455-3p_R+1          | 1,174  | 665    | 774    | 695    | 361    | 415    |
| mmu-miR-296-5p              | 1,868  | 380    | 1,064  | 1,512  | 178    | 180    |
| mmu-miR-674-3p_R-1          | 1,935  | 1,728  | 3,084  | 1,384  | 1,242  | 1,202  |
| mmu-miR-466c-3p             | 81     | 66     | 131    | 75     | 38     | 46     |
| mmu-miR-93-5p               | 7,408  | 13,384 | 14,990 | 5,427  | 8,469  | 6,797  |
| mmu-miR-92b-5p              | 223    | 144    | 134    | 115    | 91     | 83     |
| mmu-miR-194-2-3p_R-1        | 0      | 10     | 0      | 6      | 0      | 0      |
| mmu-miR-700-5p              | 1,277  | 491    | 860    | 982    | 277    | 285    |
| mmu-miR-27b-5p              | 348    | 687    | 492    | 178    | 311    | 409    |
| mmu-miR-345-5p_L+1R-1       | 1,033  | 828    | 682    | 809    | 378    | 311    |
| mmu-miR-1934-5p             | 36     | 15     | 6      | 21     | 6      | 6      |
| mmu-miR-412-3p_L+1          | 16     | 10     | 14     | 11     | 6      | 7      |
| mmu-miR-378a-5p             | 359    | 175    | 241    | 248    | 125    | 95     |
| mmu-miR-376c-5p_R+1_1ss19I3 | 0      | 0      | 0      | 2      | 0      | 0      |
| mmu-miR-466f-5p_L-1R+1      | 1      | 0      | 0      | 1      | 0      | 0      |
| mmu-miR-184-3p              | 97     | 194    | 107    | 60     | 92     | 90     |
| mmu-miR-3085-3p_R+1         | 235    | 69     | 118    | 179    | 39     | 40     |
| mmu-miR-450b-3p             | 28     | 17     | 41     | 24     | 19     | 9      |
| mmu-let-7k_R+1_1ss9GT       | 3      | 6      | 14     | 0      | 9      | 6      |
| mmu-miR-5114                | 0      | 10     | 0      | 0      | 6      | 0      |

|                             |         |         |         |        |        |        |
|-----------------------------|---------|---------|---------|--------|--------|--------|
| mmu-miR-1955-5p_R-2         | 13      | 32      | 24      | 18     | 20     | 5      |
| mmu-miR-125a-3p_R-1         | 374     | 548     | 506     | 278    | 302    | 302    |
| mmu-miR-702-3p_R+1          | 331     | 10      | 87      | 265    | 0      | 0      |
| mmu-miR-130b-5p             | 50      | 88      | 68      | 48     | 36     | 44     |
| mmu-miR-351-5p_R-4          | 799     | 1,622   | 933     | 496    | 716    | 873    |
| mmu-miR-3087-5p_R+1         | 10      | 14      | 6       | 4      | 5      | 9      |
| mmu-miR-23a-3p              | 26,444  | 25,813  | 26,591  | 22,427 | 13,367 | 13,434 |
| mmu-miR-3072-3p             | 372     | 75      | 148     | 309    | 26     | 41     |
| mmu-miR-431-5p              | 239     | 191     | 270     | 156    | 177    | 112    |
| mmu-miR-350-5p_R+3          | 198     | 157     | 202     | 165    | 91     | 99     |
| mmu-miR-146b-5p_R+2         | 8,374   | 16,738  | 9,487   | 4,805  | 7,050  | 10,303 |
| mmu-miR-466f-3p_L-1R+2_2    | 287     | 111     | 190     | 238    | 59     | 80     |
| mmu-miR-466f-3p_L-1R+2_1    | 287     | 111     | 190     | 238    | 59     | 80     |
| mmu-miR-423-5p              | 3,655   | 5,674   | 3,754   | 2,259  | 3,105  | 3,042  |
| mmu-miR-770-5p_R+1          | 1,465   | 735     | 1,935   | 1,311  | 694    | 655    |
| mmu-miR-6940-3p_R-1         | 0       | 0       | 8       | 5      | 0      | 0      |
| mmu-miR-125b-1-3p_R-1_1ss21 | 1,654   | 2,906   | 1,996   | 1,062  | 1,502  | 1,685  |
| mmu-miR-466n-3p             | 19      | 28      | 26      | 14     | 19     | 14     |
| mmu-miR-34b-3p              | 1,085   | 680     | 792     | 735    | 458    | 470    |
| mmu-let-7g-3p_L-1R+1        | 58      | 35      | 25      | 51     | 17     | 8      |
| mmu-let-7e-3p               | 1,174   | 461     | 630     | 860    | 256    | 367    |
| mmu-miR-3552                | 191     | 155     | 236     | 201    | 78     | 105    |
| mmu-miR-451a                | 113,953 | 136,451 | 144,994 | 94,961 | 91,983 | 73,776 |
| mmu-miR-671-5p_R+1          | 152     | 220     | 323     | 142    | 157    | 160    |
| mmu-miR-501-3p              | 2,668   | 3,030   | 2,156   | 1,929  | 1,299  | 1,973  |
| mmu-miR-93-3p_R+1           | 165     | 334     | 305     | 94     | 203    | 237    |
| mmu-miR-690_R-3             | 300     | 196     | 286     | 200    | 163    | 158    |
| mmu-miR-743b-3p             | 0       | 10      | 0       | 0      | 0      | 7      |
| mmu-miR-652-3p_R+1          | 5,725   | 9,016   | 7,066   | 4,202  | 5,429  | 5,049  |
| mmu-miR-7000-3p_R-2         | 10      | 0       | 0       | 7      | 0      | 0      |
| mmu-miR-674-5p_R-1          | 1,975   | 3,087   | 3,384   | 1,263  | 2,242  | 2,191  |
| mmu-miR-130a-5p             | 0       | 0       | 6       | 4      | 0      | 0      |
| mmu-miR-425-3p_R+1          | 262     | 170     | 208     | 224    | 108    | 102    |
| mmu-miR-16-5p               | 42,807  | 75,159  | 62,856  | 35,344 | 46,127 | 43,015 |
| mmu-miR-466g_1ss21AC        | 106     | 46      | 78      | 78     | 37     | 44     |
| mmu-miR-140-3p_L-1R+2       | 12,694  | 21,764  | 17,511  | 9,823  | 12,839 | 13,316 |
| mmu-miR-324-5p              | 1,230   | 1,353   | 1,266   | 1,134  | 760    | 772    |
| mmu-miR-193b-3p             | 2,272   | 448     | 544     | 1,575  | 332    | 363    |
| mmu-miR-7224-3p_L+2R-1      | 7       | 0       | 11      | 12     | 0      | 0      |
| mmu-miR-20a-3p_R+1          | 63      | 39      | 61      | 41     | 35     | 39     |
| mmu-miR-384-5p              | 8,980   | 6,436   | 6,810   | 13,739 | 8,522  | 9,067  |
| mmu-miR-301a-3p             | 1,116   | 718     | 1,036   | 1,802  | 1,237  | 1,009  |
| mmu-miR-181c-5p             | 3,123   | 2,071   | 2,700   | 4,579  | 3,232  | 3,328  |
| mmu-miR-3062-5p             | 6       | 7       | 10      | 3      | 19     | 9      |
| mmu-miR-496a-3p_L-2R+1      | 1,604   | 966     | 1,020   | 1,926  | 1,684  | 1,490  |
| mmu-miR-335-5p              | 27,555  | 35,946  | 28,019  | 35,526 | 45,991 | 48,545 |
| mmu-miR-466c-5p_R-2         | 48      | 24      | 58      | 88     | 64     | 34     |
| mmu-miR-383-5p              | 5,511   | 6,309   | 5,466   | 7,645  | 8,155  | 8,797  |
| mmu-miR-1839-3p             | 546     | 244     | 334     | 720    | 395    | 489    |
| mmu-miR-485-5p_R+1          | 1,418   | 1,828   | 1,539   | 1,814  | 2,532  | 2,510  |
| mmu-miR-411-3p_R-1          | 1,111   | 1,066   | 1,146   | 1,550  | 1,703  | 1,516  |
| mmu-miR-429-3p              | 10      | 0       | 6       | 3      | 8      | 12     |
| mmu-miR-467e-5p             | 262     | 222     | 297     | 318    | 463    | 345    |
| mmu-miR-20b-5p              | 96      | 123     | 137     | 161    | 198    | 154    |
| mmu-miR-3083-5p             | 0       | 7       | 0       | 5      | 0      | 6      |
| mmu-miR-379-5p              | 3,593   | 7,792   | 5,721   | 4,695  | 10,134 | 10,242 |

|                           |         |         |         |         |         |         |
|---------------------------|---------|---------|---------|---------|---------|---------|
| mmu-miR-3093-3p           | 18      | 31      | 30      | 32      | 44      | 40      |
| mmu-miR-434-3p            | 32,916  | 24,519  | 23,526  | 44,694  | 35,932  | 38,379  |
| mmu-miR-135a-2-3p_R+1     | 164     | 396     | 338     | 207     | 592     | 521     |
| mmu-miR-101c_L+2R+1       | 20      | 24      | 38      | 28      | 45      | 47      |
| mmu-let-7j_R-1_1ss8TG     | 2,328   | 5,133   | 3,792   | 2,602   | 6,940   | 7,161   |
| mmu-miR-539-5p_R+1        | 56      | 32      | 32      | 86      | 45      | 50      |
| mmu-miR-190a-5p_R+1       | 1,662   | 1,186   | 1,716   | 2,874   | 2,012   | 2,001   |
| mmu-miR-190a-3p           | 303     | 75      | 97      | 455     | 141     | 120     |
| mmu-miR-676-5p            | 86      | 129     | 95      | 101     | 167     | 200     |
| mmu-let-7g-5p             | 107,330 | 224,261 | 140,895 | 131,187 | 285,669 | 297,416 |
| mmu-miR-374c-3p_L-1R+4    | 60      | 66      | 100     | 113     | 121     | 108     |
| mmu-miR-9768-5p           | 0       | 7       | 0       | 5       | 6       | 0       |
| mmu-let-7f-2-3p_R+1       | 48      | 63      | 52      | 96      | 82      | 72      |
| mmu-miR-1843b-5p_L+1R-1_2 | 722     | 1,040   | 861     | 1,045   | 1,398   | 1,573   |
| mmu-miR-1843b-5p_L+1R-1_1 | 722     | 1,040   | 861     | 1,045   | 1,398   | 1,573   |
| mmu-miR-29a-3p_R-1        | 165,285 | 211,055 | 218,985 | 195,366 | 363,923 | 353,013 |
| mmu-miR-127-3p            | 72,322  | 114,395 | 71,130  | 107,359 | 123,919 | 164,192 |
| mmu-miR-666-5p_R-1        | 515     | 1,142   | 634     | 575     | 1,349   | 1,612   |
| mmu-miR-29c-3p_R-1        | 6,944   | 3,685   | 6,543   | 10,594  | 8,944   | 6,992   |
| mmu-miR-377-3p_L+3R-2     | 847     | 336     | 341     | 1,278   | 492     | 594     |
| mmu-miR-493-5p_R+3        | 48      | 63      | 47      | 65      | 80      | 99      |
| mmu-miR-380-3p_R-1        | 1,664   | 1,072   | 897     | 2,479   | 1,735   | 1,452   |
| mmu-miR-181a-1-3p         | 925     | 1,095   | 655     | 1,156   | 1,459   | 1,564   |
| mmu-miR-29b-2-5p_R-2      | 177     | 149     | 181     | 300     | 244     | 251     |
| mmu-miR-124-5p            | 87      | 83      | 100     | 121     | 158     | 145     |
| mmu-miR-185-5p            | 4,040   | 10,185  | 5,727   | 5,189   | 12,892  | 13,417  |
| mmu-miR-154-3p            | 226     | 103     | 95      | 307     | 203     | 163     |
| mmu-miR-30e-5p_R+2        | 40,427  | 34,222  | 30,789  | 60,943  | 51,309  | 55,658  |
| mmu-miR-1843a-3p          | 142     | 144     | 189     | 221     | 260     | 277     |
| mmu-miR-3061-3p           | 23      | 0       | 0       | 21      | 5       | 11      |
| mmu-miR-337-3p            | 128     | 51      | 47      | 207     | 79      | 75      |
| mmu-miR-381-3p            | 1,629   | 2,016   | 1,822   | 2,395   | 2,838   | 3,518   |
| mmu-miR-3475-3p_R-1       | 128     | 254     | 218     | 196     | 385     | 382     |
| mmu-miR-1298-5p           | 176     | 325     | 209     | 297     | 363     | 479     |
| mmu-miR-183-3p_L-1        | 78      | 212     | 122     | 104     | 211     | 345     |
| mmu-miR-369-3p            | 3,541   | 2,971   | 3,480   | 5,146   | 5,574   | 5,337   |
| mmu-miR-137-3p            | 8,763   | 4,432   | 7,660   | 14,903  | 8,455   | 10,297  |
| mmu-miR-411-5p_L+1_1ss6AG | 6,522   | 6,796   | 8,092   | 9,934   | 12,148  | 12,732  |
| mmu-miR-216b-5p           | 146     | 205     | 239     | 214     | 347     | 401     |
| mmu-miR-216a-5p           | 29      | 32      | 56      | 56      | 83      | 53      |
| mmu-mir-370-p5            | 292     | 402     | 438     | 452     | 658     | 744     |
| mmu-miR-122-5p_R-1        | 18      | 91      | 72      | 70      | 136     | 91      |
| mmu-miR-10a-5p_R-1        | 62,998  | 113,267 | 67,462  | 85,472  | 131,472 | 184,923 |
| mmu-miR-30c-1-3p          | 77      | 88      | 72      | 102     | 140     | 150     |
| mmu-miR-9-5p              | 24,016  | 35,783  | 41,908  | 43,262  | 65,887  | 59,441  |
| mmu-miR-708-5p_R-1        | 5,009   | 4,219   | 4,714   | 5,830   | 9,565   | 7,806   |
| mmu-miR-183-5p            | 4,265   | 4,038   | 2,214   | 5,521   | 4,886   | 7,128   |
| mmu-miR-128-3p            | 15,156  | 17,605  | 15,875  | 24,692  | 27,822  | 29,381  |
| mmu-miR-433-5p            | 211     | 289     | 218     | 339     | 446     | 428     |
| mmu-mir-3963-p5_1ss17TC   | 0       | 6       | 11      | 0       | 10      | 19      |
| mmu-miR-541-3p            | 119     | 147     | 63      | 154     | 192     | 211     |
| mmu-miR-488-5p_R+2        | 22      | 47      | 32      | 29      | 68      | 75      |
| mmu-miR-487b-3p           | 1,632   | 1,874   | 1,816   | 2,332   | 3,579   | 3,155   |
| mmu-miR-204-5p            | 5,185   | 4,505   | 3,387   | 8,546   | 6,885   | 6,902   |
| mmu-miR-448-5p            | 102     | 51      | 64      | 192     | 107     | 74      |
| mmu-miR-132-5p_L-1R+1     | 1,006   | 2,040   | 1,273   | 1,558   | 2,976   | 2,876   |

|                              |         |         |         |         |         |         |
|------------------------------|---------|---------|---------|---------|---------|---------|
| mmu-miR-369-5p_R-1           | 1,545   | 1,934   | 2,177   | 2,180   | 4,024   | 3,507   |
| mmu-miR-1264-3p              | 402     | 264     | 210     | 647     | 416     | 447     |
| mmu-miR-128-2-5p             | 85      | 168     | 95      | 84      | 247     | 273     |
| mmu-miR-133a-3p_L-1R+1       | 2,751   | 1,986   | 1,654   | 4,914   | 4,039   | 2,169   |
| mmu-miR-96-3p                | 9       | 6       | 0       | 5       | 11      | 11      |
| mmu-miR-7a-5p_R+1            | 4,193   | 4,514   | 3,092   | 6,634   | 5,806   | 8,303   |
| mmu-miR-181d-5p              | 1,853   | 2,508   | 1,940   | 3,044   | 3,632   | 4,418   |
| mmu-miR-3095-5p              | 0       | 6       | 0       | 6       | 0       | 5       |
| mmu-miR-582-3p_L-1R+2        | 334     | 689     | 383     | 466     | 830     | 1,196   |
| mmu-miR-329-5p_R+2           | 426     | 560     | 421     | 924     | 735     | 839     |
| mmu-miR-211-5p_R+1_1ss17TA14 |         | 11      | 16      | 29      | 25      | 20      |
| mmu-miR-34a-5p               | 6,484   | 8,272   | 8,221   | 14,724  | 14,205  | 12,184  |
| mmu-miR-377-5p               | 16      | 19      | 16      | 33      | 19      | 37      |
| mmu-miR-3084-3p_L-2R+4       | 51      | 23      | 14      | 89      | 38      | 32      |
| mmu-miR-409-5p               | 2,139   | 2,187   | 1,524   | 2,976   | 3,062   | 4,508   |
| mmu-miR-488-3p               | 284     | 335     | 264     | 512     | 472     | 608     |
| mmu-miR-344c-3p              | 26      | 16      | 26      | 64      | 32      | 26      |
| mmu-miR-6516-5p_R+3          | 29      | 47      | 42      | 81      | 67      | 66      |
| mmu-miR-154-5p               | 323     | 595     | 521     | 551     | 1,240   | 825     |
| mmu-miR-6970-3p_R+2          | 7       | 0       | 0       | 12      | 0       | 0       |
| mmu-miR-384-3p               | 4,847   | 3,931   | 3,792   | 7,621   | 8,063   | 7,277   |
| mmu-miR-3101-5p              | 0       | 6       | 0       | 0       | 6       | 5       |
| mmu-miR-10b-5p_R-1           | 184,587 | 352,091 | 182,763 | 294,430 | 426,341 | 617,695 |
| mmu-miR-449a-5p              | 8       | 21      | 24      | 20      | 35      | 43      |
| mmu-miR-3068-5p              | 450     | 225     | 190     | 828     | 366     | 419     |
| mmu-miR-582-5p               | 901     | 649     | 643     | 1,382   | 1,338   | 1,385   |
| mmu-miR-218-5p               | 3,041   | 3,188   | 3,729   | 5,496   | 7,020   | 6,125   |
| mmu-miR-376b-5p_R-1          | 193     | 134     | 186     | 395     | 264     | 303     |
| mmu-miR-136-5p               | 912     | 986     | 991     | 1,542   | 2,043   | 1,833   |
| mmu-miR-381-5p               | 42      | 23      | 55      | 93      | 65      | 68      |
| mmu-miR-135a-5p              | 2,604   | 1,777   | 2,551   | 5,033   | 4,033   | 4,007   |
| mmu-miR-6418-3p_1ss22GT      | 10      | 0       | 0       | 14      | 5       | 0       |
| mmu-miR-466o-5p              | 1       | 0       | 1       | 1       | 3       | 1       |
| mmu-miR-448-3p_R-1           | 53      | 92      | 87      | 108     | 177     | 157     |
| mmu-miR-340-3p               | 787     | 982     | 582     | 1,199   | 1,636   | 1,626   |
| mmu-miR-672-3p               | 32      | 45      | 64      | 49      | 126     | 94      |
| mmu-miR-541-5p               | 5,363   | 5,221   | 4,189   | 8,387   | 8,087   | 11,755  |
| mmu-miR-499-5p               | 170     | 185     | 156     | 227     | 372     | 382     |
| mmu-miR-182-5p               | 6,583   | 6,888   | 6,599   | 9,975   | 10,764  | 18,018  |
| mmu-miR-297b-5p              | 6       | 5       | 6       | 9       | 13      | 10      |
| mmu-miR-873a-5p_L+1R-1       | 285     | 378     | 247     | 472     | 597     | 704     |
| mmu-miR-136-3p_R-1           | 6,527   | 5,558   | 3,137   | 10,349  | 9,799   | 9,760   |
| mmu-miR-335-3p               | 403     | 334     | 267     | 759     | 499     | 726     |
| mmu-miR-434-5p               | 4,730   | 6,631   | 3,983   | 6,979   | 9,906   | 13,602  |
| mmu-miR-383-3p               | 12      | 17      | 14      | 34      | 38      | 14      |
| mmu-miR-181c-3p              | 98      | 143     | 81      | 155     | 250     | 237     |
| mmu-miR-7b-5p_R+1            | 1,993   | 2,071   | 1,367   | 3,408   | 3,184   | 4,264   |
| mmu-mir-218-2-p3             | 6       | 5       | 7       | 11      | 17      | 8       |
| mmu-miR-667-5p               | 17      | 28      | 14      | 41      | 36      | 43      |
| mmu-miR-135b-5p              | 137     | 110     | 159     | 338     | 221     | 257     |
| mmu-miR-300-5p_R+1           | 90      | 66      | 89      | 227     | 124     | 149     |
| mmu-miR-669a-3-3p_R-2        | 0       | 0       | 6       | 12      | 0       | 0       |
| mmu-miR-99a-3p_R+2           | 10      | 35      | 27      | 30      | 69      | 49      |
| mmu-miR-153-3p               | 2,434   | 1,036   | 1,717   | 4,751   | 3,503   | 2,499   |
| mmu-miR-1298-3p              | 187     | 238     | 137     | 383     | 380     | 419     |
| mmu-miR-598-3p_R+1           | 2,839   | 3,934   | 4,158   | 5,388   | 8,911   | 8,873   |

|                        |       |        |       |        |        |        |
|------------------------|-------|--------|-------|--------|--------|--------|
| mmu-miR-26b-3p         | 16    | 29     | 6     | 31     | 31     | 46     |
| mmu-miR-764-3p_L+1     | 48    | 112    | 64    | 96     | 185    | 198    |
| mmu-miR-376a-5p        | 305   | 133    | 156   | 575    | 353    | 348    |
| mmu-miR-363-5p         | 8     | 5      | 0     | 9      | 10     | 9      |
| mmu-miR-1941-3p_R+1    | 9     | 5      | 0     | 16     | 5      | 9      |
| mmu-miR-212-5p         | 512   | 777    | 363   | 870    | 1,160  | 1,597  |
| mmu-miR-344b-3p        | 160   | 207    | 161   | 269    | 433    | 460    |
| mmu-miR-96-5p          | 707   | 358    | 323   | 1,406  | 585    | 1,071  |
| mmu-miR-217-5p_R-1     | 41    | 74     | 63    | 99     | 138    | 161    |
| mmu-miR-669b-3p_L-1    | 0     | 0      | 8     | 19     | 0      | 0      |
| mmu-miR-3078-5p        | 6     | 21     | 7     | 34     | 25     | 17     |
| mmu-miR-216b-3p        | 0     | 0      | 8     | 5      | 9      | 5      |
| mmu-miR-1a-1-5p        | 27    | 9      | 11    | 66     | 24     | 18     |
| mmu-miR-1264-5p        | 73    | 72     | 73    | 155    | 162    | 187    |
| mmu-miR-365-1-5p       | 0     | 5      | 0     | 6      | 0      | 6      |
| mmu-miR-3086-3p        | 0     | 0      | 7     | 5      | 5      | 6      |
| mmu-miR-3057-5p        | 16    | 0      | 7     | 9      | 38     | 7      |
| mmu-miR-101a-5p        | 12    | 7      | 10    | 46     | 14     | 10     |
| mmu-miR-505-3p_R+2     | 28    | 23     | 38    | 86     | 73     | 56     |
| mmu-miR-3082-3p        | 8     | 13     | 7     | 18     | 15     | 36     |
| mmu-miR-3069-3p        | 7     | 5      | 10    | 22     | 18     | 15     |
| mmu-miR-6958-3p        | 8     | 0      | 6     | 16     | 9      | 12     |
| mmu-miR-3086-5p_R+2    | 0     | 18     | 21    | 25     | 32     | 46     |
| mmu-miR-466h-5p_R+1    | 12    | 0      | 0     | 9      | 9      | 15     |
| mmu-miR-551b-5p        | 11    | 7      | 0     | 16     | 16     | 17     |
| mmu-miR-544-3p_1ss22CT | 36    | 9      | 16    | 106    | 26     | 31     |
| mmu-miR-592-5p_L-1     | 81    | 109    | 131   | 204    | 374    | 308    |
| mmu-miR-3070-2-3p      | 0     | 12     | 6     | 0      | 17     | 33     |
| mmu-miR-669h-5p_R-2    | 0     | 5      | 14    | 19     | 15     | 23     |
| mmu-miR-190b-5p_R+1    | 0     | 10     | 13    | 7      | 28     | 34     |
| mmu-miR-3069-5p        | 11    | 25     | 6     | 36     | 38     | 56     |
| mmu-miR-137-5p         | 0     | 0      | 16    | 19     | 22     | 10     |
| mmu-miR-344d-3-5p      | 0     | 13     | 6     | 7      | 23     | 31     |
| mmu-miR-153-5p_L+6     | 20    | 16     | 8     | 73     | 43     | 35     |
| mmu-miR-1a-3p          | 6,821 | 25,227 | 9,938 | 18,176 | 84,400 | 44,228 |
| mmu-miR-186-3p_1ss22GA | 7     | 0      | 0     | 18     | 5      | 0      |
| mmu-miR-491-3p         | 10    | 0      | 0     | 10     | 17     | 10     |
| mmu-miR-133a-5p_L+1    | 66    | 93     | 49    | 152    | 437    | 196    |
| mmu-miR-547-3p_R+1     | 0     | 14     | 10    | 7      | 32     | 48     |

Fig.1E

| TargetScan       | miRanda           | RNA-Seq       |
|------------------|-------------------|---------------|
|                  |                   | efu-          |
| mmu-miR-1843a-3p | efu-mir-9277-p5_1 | mir-9277-p5_1 |
|                  |                   | efu-          |
| mmu-miR-488-3p   | efu-mir-9277-p5_2 | mir-9277-p5_2 |
|                  |                   | efu-          |
| mmu-miR-667-5p   | efu-mir-9277-p5_3 | mir-9277-p5_3 |

mmu-  
 mmu- miR-  
 miR- 1843a-  
 135b-5p 3p  
 mmu- mmu-  
 miR- miR-  
 1843a-3p 488-3p  
 mmu- mmu-  
 miR-488- miR-  
 3p 582-5p  
 mmu-  
 miR-  
 mmu- 873a-  
 miR-574- 5p\_L+1R  
 5p -1  
 mmu-  
 miR-  
 6516-  
 5p\_R+3  
 mmu-  
 miR-  
 873a-  
 5p\_L+1R-  
 1  
 mmu-  
 mir-  
 5132-p5

Fig.2A

|  | Prkcsh   |          | circPrkcsh |          |
|--|----------|----------|------------|----------|
|  | NC       | SCI      | NC         | SCI      |
|  | 1        | 2.361985 | 1          | 1.547565 |
|  | 0.628507 | 2.17347  | 1.006956   | 1.394744 |
|  | 0.554785 | 1.569168 | 0.784584   | 1.205808 |

Fig.2B

|            | NC       |          |          | RNase R  |          |          |
|------------|----------|----------|----------|----------|----------|----------|
| circPrkcsh | 1.147823 | 0.953761 | 0.913451 | 1.211337 | 1.027259 | 0.79504  |
| Prkcsh     | 0.666234 | 1.100836 | 1.363486 | 0.097112 | 0.094477 | 0.107231 |

Fig.2D

|            | Cytoplasm |          |          |          | Nucleus  |          |
|------------|-----------|----------|----------|----------|----------|----------|
| U6         | 0.220689  | 0.215568 | 0.205723 | 0.779311 | 0.784432 | 0.794277 |
| GAPDH      | 0.825475  | 0.799569 | 0.812235 | 0.174525 | 0.200431 | 0.187765 |
| circPrkcsh | 0.673925  | 0.659074 | 0.736029 | 0.326075 | 0.340926 | 0.263971 |

Fig.3A

|  | 0h       | 4h       | 8h       | 12h      | 24h      | 48h      |
|--|----------|----------|----------|----------|----------|----------|
|  | 0.979964 | 1.118953 | 1.187944 | 1.666244 | 1.816297 | 1.212121 |
|  | 0.848743 | 1.283441 | 1.234534 | 1.186984 | 1.662092 | 1.112676 |
|  | 1.202303 | 1.10674  | 1.633161 | 1.318228 | 1.973149 | 1.368346 |

Fig.3B

|  | 0        | 0.1      | 1        | 10       | 50       |
|--|----------|----------|----------|----------|----------|
|  | 1.029647 | 1.480858 | 1.841098 | 2.454847 | 1.258263 |
|  | 0.971207 | 1.183642 | 1.671527 | 2.673692 | 0.913789 |
|  | 1.06265  | 0.898278 | 1.35968  | 2.836149 | 0.987977 |

Fig.3C

| NC       | si1      | si2      | si3      |
|----------|----------|----------|----------|
| 0.910691 | 0.368865 | 0.504025 | 0.724638 |
| 1.036007 | 0.39359  | 0.429154 | 0.620083 |
| 1.059904 | 0.426574 | 0.395368 | 0.716497 |

Fig.3D

| NC       | OE       |
|----------|----------|
| 0.997416 | 137.7778 |
| 1.115559 | 159.3991 |
| 0.898734 | 138.919  |

Fig.3E

| NC       | siRNA    | NC       | OE       |
|----------|----------|----------|----------|
| 1.186545 | 0.513428 | 0.810415 | 1.544439 |
| 0.925347 | 0.611419 | 0.954511 | 1.646478 |
| 0.910775 | 0.435104 | 1.292741 | 1.621224 |

Fig.3F

| NC       | siRNA    | NC       | OE       |
|----------|----------|----------|----------|
| 1.089853 | 0.719564 | 0.966137 | 1.750055 |
| 0.98053  | 0.707287 | 1.03505  | 1.503474 |
| 0.935775 | 0.497534 | 1.00411  | 1.830833 |

Fig.3G

| NC       | siRNA    | NC       | OE       |
|----------|----------|----------|----------|
| 0.968517 | 2.10463  | 1.002985 | 0.554259 |
| 1.032506 | 2.680124 | 1.179684 | 0.523018 |
| 0.957603 | 1.928171 | 0.845162 | 0.54601  |

Fig.3H

| NC       | siRNA    | NC       | OE       |
|----------|----------|----------|----------|
| 0.978843 | 0.550119 | 0.997254 | 1.32085  |
| 1.021614 | 0.469734 | 1.059169 | 2.041836 |
| 0.886914 | 0.420672 | 0.946736 | 1.590816 |

Fig.3I

| NC       | siRNA    | NC       | OE       |
|----------|----------|----------|----------|
| 1.086308 | 2.085365 | 1.068386 | 0.448745 |
| 0.969648 | 2.050392 | 0.944769 | 0.41133  |
| 0.949364 | 1.893559 | 0.990709 | 0.472297 |

Fig.3J

| NC       | siRNA    | NC       | OE       |
|----------|----------|----------|----------|
| 1320.292 | 964.7325 | 1186.799 | 1981.815 |
| 1242.585 | 937.3994 | 1192.658 | 2074.291 |
| 1384.609 | 971.2504 | 1214.38  | 2029.329 |

Fig.3K

| NC        | siRNA    | NC       | OE       |
|-----------|----------|----------|----------|
| 150.76455 | 110.9934 | 149.693  | 292.028  |
| 140.40112 | 103.5445 | 151.0439 | 302.0382 |
| 153.55611 | 95.59382 | 144.7427 | 290.1342 |

Fig.3L

| NC       | siRNA    | NC       | OE       |
|----------|----------|----------|----------|
| 51.26848 | 80.11998 | 46.92881 | 36.92881 |

|          |          |          |          |
|----------|----------|----------|----------|
| 52.96166 | 90.37355 | 50.11576 | 32.24623 |
| 46.61543 | 86.61543 | 52.98455 | 33.05079 |

Fig.4B

|               | miR-488 NC |   |   | miR-488 OE |          |          |
|---------------|------------|---|---|------------|----------|----------|
| circPrkcshWT  | 1          | 1 | 1 | 0.599884   | 0.63219  | 0.658934 |
| circPrkcshMUT | 1          | 1 | 1 | 1.105168   | 1.392816 | 0.912587 |

Fig.4C

|  | MUT      | WT       |
|--|----------|----------|
|  | 0.927702 | 2.123631 |
|  | 0.992565 | 2.206766 |
|  | 1.086007 | 2.240054 |

Fig.4D

|  | Ago2     | IgG      |
|--|----------|----------|
|  | 1.595767 | 0.991167 |
|  | 1.723869 | 1.109493 |
|  | 2.081466 | 0.909345 |

Fig.5A

|  | NC       | OE       |
|--|----------|----------|
|  | 0.901209 | 3.102648 |
|  | 1.046037 | 2.758339 |
|  | 1.060786 | 2.882459 |

Fig.5B

|  | NC       | KD       | NC       | OE       |
|--|----------|----------|----------|----------|
|  | 1.040661 | 1.133263 | 1.004632 | 0.686437 |
|  | 0.960928 | 1.388169 | 1.002823 | 0.640646 |
|  | 1.002148 | 1.263171 | 0.992588 | 0.613953 |

Fig.5C

|  | NC       | KD       | NC       | OE       |
|--|----------|----------|----------|----------|
|  | 1.044274 | 1.309788 | 1.008679 | 0.7733   |
|  | 0.97838  | 1.287822 | 0.986483 | 0.867659 |
|  | 0.98053  | 1.310136 | 1.00498  | 0.812459 |

Fig.5D

|  | NC       | KD       | NC       | OE       |
|--|----------|----------|----------|----------|
|  | 0.91342  | 0.7733   | 1.002985 | 1.553063 |
|  | 1.094787 | 0.795481 | 1.179684 | 1.462699 |
|  | 1.004103 | 0.873936 | 0.845162 | 1.553063 |

Fig.5E

|  | NC       | KD       | NC       | OE       |
|--|----------|----------|----------|----------|
|  | 0.992351 | 1.4228   | 1.015577 | 0.684474 |
|  | 1.03578  | 1.652042 | 0.984662 | 0.819699 |
|  | 1.006944 | 1.67764  | 0.995919 | 0.752086 |

Fig.5F

|  | NC       | KD       | NC       | OE       |
|--|----------|----------|----------|----------|
|  | 0.979081 | 0.923766 | 1.12376  | 1.314214 |
|  | 0.995919 | 0.954753 | 1.056237 | 1.299359 |
|  | 1.048989 | 0.938308 | 0.973554 | 1.185339 |

Fig.5G

|  | NC | KD | NC | OE |
|--|----|----|----|----|
|--|----|----|----|----|



|          |          |          |          |
|----------|----------|----------|----------|
| 1419.075 | 1651.099 | 1362.031 | 974.4814 |
| 1447.321 | 1900.338 | 1386.836 | 964.6922 |
| 1481.009 | 2017.209 | 1568.821 | 1198.5   |

Fig.5H

| NC        | KD       | NC       | OE       |
|-----------|----------|----------|----------|
| 145.99341 | 200.9934 | 151.5043 | 101.608  |
| 156.54445 | 210.5445 | 152.3482 | 103.943  |
| 148.59382 | 220.9934 | 143.456  | 110.1454 |

Fig.5I

| NC       | KD       | NC       | OE       |
|----------|----------|----------|----------|
| 51.84223 | 36.44209 | 51.84223 | 73.22057 |
| 47.78929 | 42.5237  | 48.04055 | 72.5237  |
| 53.05079 | 38.19562 | 54.24623 | 67.5679  |

Fig.5K

|          | miR-488 OENC |   | miR-488 OE |          |          |          |
|----------|--------------|---|------------|----------|----------|----------|
| Ccl2 WT  | 1            | 1 | 1          | 0.817283 | 0.82044  | 0.818861 |
| Ccl2 MUT | 1            | 1 | 1          | 0.793868 | 1.185136 | 0.999502 |

Fig.5L

| I        | II       | III      | IV       | V        | VI       |
|----------|----------|----------|----------|----------|----------|
| 0.965713 | 1.071811 | 3.374561 | 2.341798 | 1.764427 | 2.695931 |
| 1.00505  | 0.933001 | 3.368485 | 2.661089 | 1.722615 | 2.509645 |
| 1.030302 | 1.104161 | 3.231267 | 2.596647 | 1.804376 | 2.635269 |
